1 **Title**

2 Effect of a needs-based model of care on the characteristics of healthcare services in  
3 England: the i-THRIVE National Implementation Programme

4

5 **Short title**

6 Effect of needs-based care on healthcare services

7

8 **Authors**

9 R Sippy<sup>1</sup>, L Efstathopoulou<sup>2,3</sup>, E Simes<sup>2,3</sup>, M Davis<sup>2,3</sup>, S Howell<sup>2,3</sup>, B Morris<sup>2</sup>, O Owrid<sup>2,3</sup>, N  
10 Stoll<sup>2,3</sup>, A Moore<sup>1,2,3\*</sup>, P Fonagy<sup>2,3</sup>

11

12 <sup>1</sup>Department of Psychiatry, University of Cambridge, Cambridge, United Kingdom

13 <sup>2</sup>Anna Freud National Centre for Children and Families, London, United Kingdom

14 <sup>3</sup>Department of Department of Clinical, Educational and Health Psychology, University  
15 College London, London, United Kingdom

16

17 \* corresponding author, am2708@medschl.cam.ac.uk, Clifford Allbutt Building, Hills Road,  
18 Cambridge, CB2 0XY

19

20 **Word count**

21 3,584

22

23

24

25

26

27

28 **Abstract**

29 **Aims:** Developing integrated mental health services that focus on the needs of children and  
30 young people is a key policy goal in England. The THRIVE Framework and its associated  
31 implementation programme, i-THRIVE, are now used in areas covering over 65% of  
32 England's children. This study explores the experiences of staff involved with the i-THRIVE  
33 programme, assesses its effectiveness, and examines how local system working  
34 relationships influence the programme's success.

35 **Methods:** The i-THRIVE programme was evaluated among twenty participating sites (ten  
36 implementation and ten comparison sites). Measurements included surveys of staff and  
37 leaders at each site and assessment of the "THRIVE-like" features of each site. Additional  
38 site-level characteristics were collected from health system reports. The effect of i-THRIVE  
39 was evaluated using a four-group propensity-score weighted difference-in-differences model;  
40 the moderating effect of local system working relationships was evaluated with a difference-  
41 in-difference-in-differences model.

42 **Results:** The results show that strong working relationships in the local system significantly  
43 enhances the effectiveness of the i-THRIVE programme. Sites with highly effective working  
44 relationships showed a notable improvement in "THRIVE-like" features, with an average  
45 increase of 16.41 points (95% confidence interval: 1.69–31.13, p-value: 0.031) compared to  
46 control sites. In contrast, sites with ineffective working relationships did not benefit from the i-  
47 THRIVE programme (-2.76, 95% confidence interval: -18.25–12.73, p-value: 0.708). This  
48 influence of working relationship effectiveness was consistent across various levels of  
49 THRIVE features.

50 **Conclusions:** The findings underscore the importance of working relationship effectiveness  
51 in the successful adoption and implementation of health policies like i-THRIVE.

52

## 53 **Background**

54 Mental healthcare has numerous well-supported models. However, the continued presence  
55 of inadequate care is mainly due to difficulties in applying these changes (Shortell et al.,  
56 1993; Grol and Grimshaw, 2003). The transformative "Future in Mind" report (Department of  
57 Health, 2015) suggested deviating from a generic, health-centred model to a more  
58 responsive model for the specific needs of local young populations. It called for service  
59 providers and funders to overhaul children and young people's mental health (CYPMH)  
60 services into comprehensive systems, offering a range of services from prevention to risk  
61 management. This study focuses on reforming a flawed system of service provision,  
62 characterised by disunity, inefficiency, and limited access to services.

63 Since 2016, Child and Adolescent Mental Health Services (CAMHS) within England's  
64 National Health Service (NHS) have seen significant changes, advancing more  
65 comprehensive approaches to care (Rocks et al., 2020). The National i-THRIVE Programme  
66 (NIP) assists CAMHS sites in adopting the THRIVE principles, which prioritise patient needs  
67 and cohesive service provision through collaborative care networks (Moore et al., 2023). i-  
68 THRIVE was created following implementation science guidelines to facilitate the adoption of  
69 THRIVE principles by CAMHS (Moore et al., 2016).

70 The NIP is explained in a published study protocol (Moore et al., 2023). Briefly, i-THRIVE  
71 translates the complex aspects of a 'THRIVE-like' system into practical structures and tools  
72 for CAMHS to use in their transformation. The NIP guides CAMHS staff and leaders in  
73 developing local models based on THRIVE principles and creating detailed plans for  
74 implementation over four phases. Over 65% of children and young people (CYP) live in  
75 areas where i-THRIVE has been adopted (i-THRIVE Team). Although in use since 2016, the  
76 effectiveness of NIP as an implementation model has not been assessed. This study  
77 evaluates the alignment of frontline staff with THRIVE principles, and the effectiveness of  
78 NIP in implementing these principles in CAMHS sites.

79 The THRIVE principles of care encompass characteristics at three levels: macro, meso, and  
80 micro. At the macro level, characteristics include interagency function and cooperation. This

81 means a CAMHS system following the "THRIVE-like" approach would involve supporting  
82 bodies such as educational and social services in its policy-making and service delivery  
83 (Moore et al., 2023). At the meso level, they include a needs-based perspective focusing on  
84 CYP and their support services. A site adhering to meso-level THRIVE principles would be  
85 expected to have a network of community providers (Moore et al., 2023). At the micro level,  
86 these characteristics involve the interactions between CYP, their families, and healthcare  
87 professionals (Moore et al., 2023). The embodiment of THRIVE principles depends not only  
88 efforts by the CAMHS site but also on broader community involvement, requiring effective  
89 working relationships among local systems.

90 We focus on the average effect of NIP on the implementation sites. For this estimate, we  
91 need to know the outcome at each site if NIP had not been implemented (the potential  
92 outcome or unobserved counterfactual) (Stuart, 2010). The difference in differences (DiD)  
93 approach compares changes in outcomes between implementation and control sites before  
94 and after the intervention (Stuart et al., 2014). A key assumption for DiD is that the average  
95 outcomes for both groups would have similar trends over time (Xu, 2017), which may not  
96 always be plausible. Participation in NIP is voluntary, meaning sites that choose to  
97 participate may differ from those that do not. The four-group propensity score-weighted DiD  
98 method overcomes these issues by adjusting the implementation and control groups while  
99 considering time factors. This adjustment ensures comparability among the groups and  
100 reduces bias in estimating the desired effect. It's particularly useful when group composition  
101 changes during the study, such as when health practitioners move between Clinical  
102 Commissioning Groups (CCGs).

103 In this study, we assess the effect of the NIP on implementation sites using the four-group  
104 propensity-score weighted DiD method. Additionally, we examine how the effectiveness of  
105 local system working relationships influences the impact of the NIP.

106

## 107 **Methods**

### 108 Study Setting and Design

109 The study protocol is detailed elsewhere (Moore et al., 2023). In brief, we selected twenty  
110 CAMHS sites in England: ten of these sites have been using i-THRIVE since 2016  
111 (NIP/implementation sites), and ten others were using different approaches for  
112 transformation (comparison sites). Details on the delivery of NIP are in Supplemental  
113 Material S1. This study reporting conforms to the Template for Intervention Description and  
114 Replication (TIDieR) statement (Hoffmann et al., 2014); the TIDieR checklist is provided in  
115 Supplemental Material S2.

116 The NIP sites were Bexley, Cambridgeshire and Peterborough (CambPeter), Camden,  
117 Hertfordshire (Herts), Luton, Manchester (MancSal), Stockport, Tower Hamlets (TowerHam),  
118 Waltham Forest (WalthamF), and Warrington. The comparison sites included Bradford,  
119 Ipswich and East Suffolk (EastSuff), Lewisham, Norfolk, Northampton (NeneCorby),  
120 Portsmouth, Southampton, Stoke-on-Trent (Stoke), Sunderland, and South Worcestershire  
121 (Worcester). Additional site details are in Supplemental Material S3.

## 122 Surveys

123 Two surveys were designed based on the RE-AIM Adoption Framework (Glasgow et al.,  
124 2019). The staff survey assessed the staff awareness of THRIVE and use of THRIVE  
125 principles. Site leaders distributed the survey to professionals involved in providing and  
126 commissioning CYPMH services. The survey was administered in August 2019, October  
127 2019, and January 2020.

128 A survey for transformation leads was also conducted. This survey, completed by  
129 programme managers, gathered information about site transformation activities and the  
130 support they received. It was distributed from January to May 2020.

## 131 Measurements and Data

132 The primary focus is the degree to which sites follow the THRIVE principles of care, the  
133 reporting of which conforms to the Revised Standards for Quality Improvement Reporting  
134 Excellence (SQUIRE 2.0) statement (Ogrinc et al., 2016); the SQUIRE checklist is provided  
135 in Supplemental Material S4. The THRIVE principles of care encompass macro-, meso-, and  
136 micro-level features. We assessed these features in participating sites using the i-THRIVE

137 Assessment Tool (Moore et al., 2023). Sites received an overall fidelity and level-specific  
138 scores. Higher scores indicate better adherence to THRIVE principles. Fidelity to i-THRIVE  
139 was measured at each site before and after the intervention by at least two independent  
140 evaluators, with scores averaged for each site and period. When there was not enough  
141 information to assign a score, we estimated the missing scores using the mean difference  
142 between pre- and post-intervention scores for the site, based on the score for the available  
143 period.

144 To calculate propensity score weights, it is important to identify site characteristics that might  
145 cause selection bias or have a confounding effect (Stuart et al., 2014). These characteristics  
146 were measured in 2016 and 2019, unless stated otherwise. They included population density  
147 (total population per square kilometre) for each CCG (Office for National Statistics, 2016;  
148 Office for National Statistics, 2017), annual funding support (£100,000 increments) per CCG  
149 (NHS England, 2017a), effectiveness of working relationships in the local system (NHS  
150 England, 2021), Indices of Multiple Deprivation (IMD) ranks (Department for Communities  
151 and Local Government, 2015; Department for Communities and Local Government, 2019),  
152 the initial number of CCGs per site (NHS England, 2019), and compliance in 2017 with the  
153 CCG Improvement and Assessment Framework Mental Health Transformation Milestones  
154 (NHS England, 2017b). For sites comprising multiple CCGs, we summed the annual funding  
155 and averaged the population density, effectiveness of working relationships in the local  
156 system, and transformation compliance across CCGs. Site-level IMD ranks were calculated  
157 using the method recommended by the Office of National Statistics (Noble et al., 2019).

#### 158 Statistical Analysis

159 We analysed the staff survey results using the chi-squared test and Cramer's V as a  
160 measure of association. We used a binomial distributed generalised linear model with a log  
161 link for site-specific results, excluding "I don't know" responses. To determine if any site had  
162 an unusual probability of a "yes" response, we compared the "yes" probability for each site  
163 to the average among comparison sites.

164 Voluntary participation in health policy implementations like the NIP can lead to selection  
165 bias, as the sites that choose to participate may differ from those that do not. To correct for  
166 this, we applied propensity score weighting (Rosenbaum and Rubin, 1985) to equalise the  
167 distribution of characteristics between the implementation and control sites. We used a four-  
168 group weighting method (pre-implementation i-THRIVE, post-implementation i-THRIVE, pre-  
169 implementation comparison, and post-implementation comparison) to align characteristics  
170 across all groups with those of the pre-implementation i-THRIVE sites (Stuart et al., 2014).  
171 These propensity scores were calculated using a multinomial model with five site  
172 characteristics (population density, annual funding, IMD rank, the number of CCGs per site,  
173 and transformation compliance). Characteristic balance was checked using the standardised  
174 difference in means (Stuart, 2010). The impact of NIP on fidelity was estimated using  
175 maximum-likelihood repeated measures linear regression with an auto-regressive correlation  
176 structure, weighted with the calculated propensity scores. To account for remaining  
177 characteristic imbalances, we included population density, IMD, and transformation  
178 compliance in the final model. The results from this model represent the four-group weighted  
179 DiD effect estimate.

180 To assess the reliability of our fidelity results, we conducted a series of sensitivity analyses.  
181 We employed different methods to estimate the effect of the NIP, including the standard  
182 (unweighted) DiD and alternative model specifications. We examined the impact of non-  
183 compliant control sites by repeating the analysis, excluding these sites. More details can be  
184 found in Supplemental Material S5.

185 To examine variations in the effect of i-THRIVE, we investigated a possible effect moderator,  
186 specifically the quality of local system working relationships on i-THRIVE implementation.  
187 Further details are available in Supplemental Material S7.

188 All data visualisation, cleaning, and propensity score modelling was performed in R version  
189 4.2.3 (The R Foundation for Statistical Computing, Vienna, Austria) and RStudio version  
190 2023.03.0 (RStudio, Inc., Boston, MA, USA), with R packages cowplot, extrafont, ggpattern,  
191 ggspatial, gridExtra, haven, nnet, RColorBrewer, readxl, reshape2, sf, tableone, and

192 tidyverse (Venables and Ripley, 2002; Wickham, 2007; Neuwirth, 2014; Auguie, 2017;  
193 Wickham and Miller, 2017; Pebesma, 2018; Wickham et al., 2019; Wilke, 2020; FC et al.,  
194 2022; Yoshida and Bartel, 2022; Chang, 2023; Dunnington, 2023; Pebesma and Bivand,  
195 2023; Wickham and Bryan, 2023). The simple DiD, four-group weighted DiD, and effect  
196 modification analyses were performed in SAS® version 3.81 (SAS Institute Inc., Cary, NC,  
197 USA) in SAS® Studio.

198

## 199 **Results**

### 200 Surveys

201 The staff survey had 689 responses across 19 sites (no responses from Luton). Detailed  
202 survey results are in Supplemental Material S7.

203 While the THRIVE Framework was widely known, more implementation respondents  
204 recognised it (83.9% vs. 70.5%,  $p < 0.0001$ ). A higher proportion of implementation  
205 respondents reported using THRIVE principles in their daily practice (58.5% vs. 49.0%,  
206  $p = 0.03$ ). Implementation respondents were more likely to score perfectly on a test of the  
207 THRIVE Framework (34.1% vs. 22.9%,  $p = 0.001$ ).

208 The transformation leads survey included eight managers from seven implementation sites  
209 and eight managers from seven comparison sites. Notably, managers from four comparison  
210 sites (Bradford, NeneCorby, Norfolk, and Sunderland) reported using THRIVE as their  
211 service transformation model. This prompted a more detailed examination of staff survey  
212 results concerning THRIVE implementation at comparison sites.

213 The site-level analysis of survey results can be found in Supplemental Material S7. Among  
214 those who provided a yes/no response at comparison sites, NeneCorby and Norfolk reported  
215 a higher likelihood of implementing THRIVE. The odds of respondents reporting site  
216 implementation of THRIVE were 4.43 in NeneCorby (95% CI: 1.33–14.80) compared to  
217 other comparison sites (76.5% vs. 59.5%), and 4.43 in Norfolk (95% CI: 2.32–8.47)  
218 compared to other comparison sites (76.5% vs. 59.5%). Among respondents at comparison  
219 sites, there was no difference in personal use of THRIVE principles compared to other



220 comparison sites. Regarding knowledge of the THRIVE Framework, respondents from  
221 Norfolk had a higher probability of achieving a perfect score on the quiz: the odds of scoring  
222 perfectly were 3.73 (95% CI: 2.25–6.19), compared to other comparison sites (37.7% vs.  
223 22.9%).

#### 224 THRIVE Fidelity

225 During the pre-implementation period, i-THRIVE sites had an average fidelity score of 149.0  
226 (range: 132.0—180.2) and comparison sites had an average score of 133.4 (range: 113.0—  
227 158.2). Following implementation, i-THRIVE sites had an average score of 166.6 (range:  
228 145.5—195.0), while comparison sites had an average of 142.2 (range: 132.0 —175.0). Two  
229 sites had incomplete fidelity score information: the macro-level components for Bexley  
230 during the post-implementation period and the meso-level components for Stoke during the  
231 pre-implementation period (scores were assigned as outlined in the methods section).  
232 Detailed fidelity scores by level and site are illustrated in Figure 1, and a map showing the  
233 changes in scores by site throughout the study is presented in Figure 2.

234

235

236 **Figure 1: Fidelity Scores by Site**

237 Total fidelity scores during the pre- and post-implementation periods are represented by bar

238 height, with patterned overlay to indicate component levels (macro, meso, micro).

239 Implementation sites are in panel A (blue) while comparison sites are in panel B (red).

240 CambPeter = Cambridgeshire & Peterborough, Herts = Hertfordshire, MancSal =

241 Manchester, TowerHam = Tower Hamlets, WalthamF = Waltham Forest, EastSuff = East

242 Suffolk, NeneCorby = Nene & Corby, SouthHam = Southampton, Stoke = Stoke-on-Trent

243

244

245 **Figure 2: Change in Fidelity Scores Over Study Period**

246 The difference in total fidelity scores during the pre- and post-implementation periods are  
247 represented by colour, with an increased score in green and a decreased score in red, on a  
248 background map of Clinical Commissioning Groups in panel A. Study sites have a bold  
249 outline (comparison sites in red, implementation sites in blue). Inset maps for North  
250 West/Midlands, London, and South East are in panels B–D, respectively.

251

252

253 Site characteristics, adjusted using four-group propensity-score weighting, are in Table S5,  
254 Supplemental Material S7. In our analysis of the weighted standardised differences, we  
255 identified some remaining imbalances, specifically in population density for the pre-  
256 implementation control group, IMD rank for both control groups, and transformation  
257 compliance for both control groups. These covariates were included in our effect estimate  
258 model, ensuring a more accurate assessment of NIP impact.

259 The NIP effect estimates are presented in Table 1. Our analysis reveals that the overall  
260 fidelity scores were moderately influenced by the NIP. Specifically, i-THRIVE sites showed  
261 an average improvement of 7.05 points (95% CI: -4.47–18.57). The most notable  
262 improvements were at the macro level, where i-THRIVE sites increased by an average of  
263 2.92 points (95% CI: -1.09–6.92), followed by the meso level with an average increase of  
264 2.76 points (95% CI: -1.98–7.51), and the micro level with an average increase of 1.39  
265 points (95% CI: -3.94–6.72).

266 When comparing the four-group weighted DiD with the standard DiD analyses  
267 (Supplemental Material S5), we found comparable effects on overall and macro-level fidelity.  
268 There were shifts in the impacts on meso- and micro-level fidelity. This suggests that lower-  
269 level fidelity was more sensitive to the disparities between i-THRIVE and comparison  
270 groups, which were corrected through the four-group propensity-score weighting approach.  
271 Alternative modelling approaches produced results similar to our analysis. The exclusion of  
272 non-compliant comparison sites did not alter the results.

273 We observed a moderating effect of local systems working relationship effectiveness on the  
274 impact of the NIP for overall and macro-level fidelity. i-THRIVE was found to be more  
275 effective at sites with highly effective working relationships. The detailed results are in Table  
276 2. i-THRIVE sites with highly effective working relationships showed increased fidelity scores  
277 compared to comparison sites with highly effective working relationships. The most  
278 significant impact was on overall fidelity scores (16.41, 95% CI: 1.69–31.13), followed by  
279 macro-level scores (6.95, 95% CI: 2.15–11.75). The moderating influence of highly-effective  
280 working relationships on meso-level and micro-level fidelity was modest (5.52, 95% CI: -

281 0.66–11.71 and 3.95 points, 95% CI: -3.24–11.15, respectively). Notably, there was no  
282 discernible impact of the NIP on sites with ineffective working relationships across any  
283 fidelity level.

284

## 285 **Discussion**

286 A major obstacle in implementing any complex intervention is ensuring it becomes a routine  
287 practice across the entire organisation. This concept is often described as making it 'the way  
288 we do things around here' (Haines et al., 2004; Proctor et al., 2011). Both THRIVE and i-  
289 THRIVE are frequently mentioned in child mental health policy documents, by NHS  
290 England's regional transformation boards, and in media related to child mental health. It is  
291 encouraging for policymakers to note that over 70% of staff at comparison sites were aware  
292 of THRIVE, and nearly 23% exhibited perfect knowledge of THRIVE principles. Despite this  
293 high level of awareness, staff at i-THRIVE sites were significantly more likely to be familiar  
294 with, understand, and apply THRIVE principles in their daily work. This indicates that the NIP  
295 aids in embedding THRIVE principles within an organisation.

296 When introducing new health policies, understanding their impact and identifying the  
297 contexts in which they are most effective is crucial. Estimating the mean effect presents  
298 several methodological challenges, especially when data from pre-implementation periods  
299 are scarce or when only a few sites are involved. Unlike randomised controlled trials, the  
300 adoption of health policies is not random. This means that the characteristics of the  
301 implementation and control sites are likely to vary, leading to potential selection bias. Yet, it  
302 is a useful methodological approach for evaluating complex interventions selected and  
303 implanted by policymakers. It is often unclear which characteristics influence a site's  
304 decision to adopt a health policy. Even with numerous characteristics measured, careful  
305 consideration of each characteristic's role is necessary. Confounding is another potential  
306 bias, where some characteristics may influence both the decision to implement and the site's  
307 capacity to do so effectively.

308 To adjust for these biases, various methods are available, but these methods can  
309 themselves introduce bias. Sensitivity analyses are essential in gaining a deeper  
310 understanding of the data. The four-group propensity-score weighting DiD method is  
311 designed to mitigate potential selection biases and confounding factors (Stuart et al., 2014).  
312 However, a key assumption of DiD, the parallel trends assumption, is not verifiable.  
313 Violations of the parallel trends assumption can lead to issues with time-varying confounding  
314 (Xu, 2017), complicating the interpretation of results. Thus, while our study provides valuable  
315 insights into the effectiveness of the NIP, these issues must be considered when interpreting  
316 the findings.

317 The future direction of this research will involve comprehensive evaluations of the service  
318 and clinical impacts of the NIP. These evaluations will encompass a range of critical factors,  
319 including the accessibility and efficiency of services, clinical outcomes, patient experiences,  
320 and the specific impacts on various sub-groups within the patient population. The latter will  
321 particularly focus on racial or ethnic minorities and distinct diagnostic categories, ensuring a  
322 broad and inclusive understanding of the NIP's effectiveness.

### 323 **Conclusions**

324 This study's investigation into the effectiveness of the NIP in England offers significant  
325 insights into the implementation of complex health interventions, particularly in the field of  
326 CAMHS. The findings underscore the importance of effective working relationships among  
327 local systems in the successful adoption and implementation of health policies like i-  
328 THRIVE. Specifically, the study demonstrates that sites with highly effective working  
329 relationships exhibit substantial improvements in adhering to THRIVE principles, as  
330 evidenced by the increase in fidelity scores across macro, meso, and micro levels.

331 The broad awareness of the THRIVE framework among staff, even in comparison sites,  
332 highlights the programme's permeation in the field of child mental health. However,  
333 implementation strategies are critical in embedding these principles more deeply within

334 organisations. This distinction is crucial for policymakers and healthcare leaders aiming to  
335 foster more effective, integrated mental health services tailored to the needs of CYP.  
336 Methodologically, the study navigates the challenges of evaluating health policy  
337 implementations in non-randomised settings. The use of four-group propensity-score  
338 weighted DiD analysis is an effective approach to address potential biases, such as  
339 selection bias and confounding factors. However, it also highlights the inherent complexities  
340 and limitations in evaluating policy impact in real-world settings. The study's sensitivity  
341 analyses further strengthen the validity of its findings.  
342 In conclusion, the NIP presents a promising model for CAMHS. Its emphasis on effective  
343 working relationships and the tailored approach to implementation are key factors in its  
344 success. The insights from this study contribute valuable knowledge to the ongoing efforts to  
345 improve mental health services and can guide future policies and programmes aimed at  
346 enhancing the well-being of CYP.

347

#### 348 **Financial support**

349 This study is independent research funded by the National Institute for Health and Care  
350 Research (NIHR) Applied Research Collaboration North Thames (grant number CRJM,  
351 46AZ74-/RCF/CLAHRC/UCL004, 52AZ95/AA2/UCL5, 52AZ95/AA2/UCL6, UCLP) and  
352 UCLPartners, both awarded to AM. The views expressed in this publication are those of the  
353 author(s) and not necessarily those of the NIHR, the Department of Health and Social Care  
354 or UCLPartners. All research at the Department of Psychiatry in the University of Cambridge  
355 is supported by the NIHR Cambridge Biomedical Research Centre (BRC-1215-20014) and  
356 NIHR Applied Research Centre. The views expressed are those of the author(s) and not  
357 necessarily those of the NIHR or the Department of Health and Social Care.

#### 358 **Conflicts of Interest**

359 AM was the lead for i-THRIVE between January 2015 and January 2017 during which she  
360 led the development of the i-THRIVE implementation approach and established the

361 community of practice. She was an employee of one i-THRIVE implementation site during  
362 the evaluation.

363 LE was an employee of one i-THRIVE implementation site during the evaluation.

364 PF is currently on the board of the i-THRIVE Implementation Programme. Anna Freud  
365 Centre hosted the development and on-going implementation of the THRIVE Framework in  
366 collaboration with the Tavistock & Portman NHS Foundation Trust. He is Programme  
367 Director of Mental Health at UCLPartners which provides programme management of the i-  
368 THRIVE Implementation Programme.

### 369 **Ethical Standards**

370 The NHS/University Joint Research Office reviewed this study and classified it as a service  
371 evaluation, meaning it does not need ethical approval or a review by the Research Ethics  
372 Committee (IRAS application number: 250439). For the qualitative parts of the study,  
373 participants included implementation leads, managers, and front-line staff, who were  
374 interviewed about their service transformation projects. At the start of each interview, verbal  
375 informed consent was obtained, which included explicit permission for the interview to be  
376 recorded, analysed, and used in the service evaluation. This consent was recorded, and  
377 transcripts of each interview were made to document it.

378 The data for the quantitative evaluation is retrospective and was routinely collected from  
379 service records. It was anonymised at the source by the business intelligence staff at each  
380 trust, with all identifying information removed. After review by local information governance  
381 leads, this anonymised data was provided to the evaluation team. As the data is  
382 retrospective and de-identified, consent for its use in the evaluation is neither legally nor  
383 ethically required. The requirement for ethical approval was therefore waived by the joint  
384 research office.

### 385 **Availability of Data and Materials**

386 All datasets and code are accessible on GitHub (Sippy, 2023).

387

### 388 **Acknowledgements**



389 The authors are indebted to the clinicians, managers and academics who have created  
390 THRIVE and their generous help and thoughtful advice throughout the evaluation to assess  
391 its effectiveness, in particular Sophie Dunn. We would also like to thank Rudolf Cardinal for  
392 help with the research.

393

## 394 **References**

395 **Auguie B** (2017) gridExtra: Miscellaneous functions for “Grid” graphics.

396 **Chang W** (2023) extrafont: Tools for Using Fonts.

397 **Department for Communities and Local Government** (2015) English Indices of  
398 Deprivation 2015 File 5 Scores for the Indices of Deprivation.

399 **Department for Communities and Local Government** (2019) English Indices of  
400 Deprivation 2019 File 5 Scores for the Indices of Deprivation.

401 **Department of Health** (2015) Future in mind: Promoting, protecting and improving our  
402 children and young people’s mental health and wellbeing.

403 **Dunnington D** (2023) ggspatial: Spatial data framework for ggplot2.

404 **FC M, Davis TL, ggplot2 authors** (2022) ggpattern: 'ggplot2 Pattern Geoms.

405 **Glasgow RE, Harden SM, Gaglio B, Rabin B, Smith ML, Porter GC, Ory MG,**  
406 **Estabrooks PA** (2019) RE-AIM Planning and Evaluation Framework: Adapting to  
407 New Science and Practice With a 20-Year Review. *Frontiers in Public Health* **7**: 64

408 **Grol R, Grimshaw J** (2003) From best evidence to best practice: Effective implementation  
409 of change in patients’ care. *Lancet* **362**: 1225–1230

410 **Haines A, Kuruvilla S, Borchert M** (2004) Bridging the implementation gap between  
411 knowledge and action for health. *Bulletin of the World Health Organization* **82**: 724–  
412 731; discussion 732

413 **Hoffmann TC, Glasziou PP, Boutron I, Milne R, Perera R, Moher D, Altman DG,**  
414 **Barbour V, Macdonald H, Johnston M, et al** (2014) Better reporting of  
415 interventions: template for intervention description and replication (TIDieR) checklist  
416 and guide. *British Medical Journal Clinical Research* **348**: g1687

417 **i-THRIVE Team** National i-THRIVE Community of Practice. Anna Freud National Centre for  
418 Children and Families

419 **Moore A, Jenkins P, Harris R, Fonagy P, Wolpert M** (2016) The crisis in CAMHS: Can i-  
420 Thrive provide a solution? *British Association for Counselling and Psychotherapy*  
421 *Children, Young People and Families* 4–10

422 **Moore A, Lindley Baron-Cohen K, Simes E, Chen S, Fonagy P** (2023) A protocol for a  
423 multi-site cohort study to evaluate child and adolescent mental health service  
424 transformation in England using the i-THRIVE model. *PLoS ONE* **18**: e0265782

- 425 **Neuwirth E** (2014) RColorBrewer: ColorBrewer Palettes.
- 426 **NHS England** (2017a) Mental Health Five Year Forward View Dashboard.
- 427 **NHS England** (2021) CCG Improvement and Assessment Framework (CCG IAF) Data  
428 Extract 2017/18.
- 429 **NHS England** (2019) CCG Allocations 2019/20 to 2023/24 - Technical Guidance.
- 430 **NHS England** (2017b) Mental Health Five Year Forward View Dashboard.
- 431 **Noble S, McLennan D, Noble M, Plunkett E, Gutacker N, Silk M, Wright G** (2019) The  
432 English Indices of Deprivation 2019.
- 433 **Office for National Statistics** (2016) CCG (July 2015) Ultra Generalised Clipped  
434 Boundaries in England.
- 435 **Office for National Statistics** (2017) CCG (April 2018) Ultra Generalised Clipped  
436 Boundaries in England.
- 437 **Ogrinc G, Davies L, Goodman D, Batalden P, Davidoff F, Stevens D** (2016) SQUIRE 2.0  
438 (Standards for QUality Improvement Reporting Excellence): revised publication  
439 guidelines from a detailed consensus process. *British Medical Journal Quality &*  
440 *Safety* **25**: 986–992
- 441 **Pebesma E** (2018) Simple features for R: Standardized support for spatial vector data. *The*  
442 *R Journal* **10**: 439–446
- 443 **Pebesma E, Bivand R** (2023) Spatial data science: With applications in R. doi:  
444 10.1201/9780429459016
- 445 **Proctor E, Silmere H, Raghavan R, Hovmand P, Aarons G, Bunger A, Griffey R,**  
446 **Hensley M** (2011) Outcomes for implementation research: conceptual distinctions,  
447 measurement challenges, and research agenda. *Administration and Policy in Mental*  
448 *Health* **38**: 65–76
- 449 **Rocks S, Fazel M, Tsiachristas A** (2020) Impact of transforming mental health services for  
450 young people in England on patient access, resource use and health: a quasi-  
451 experimental study. *British Medical Journal Open* **10**: e034067
- 452 **Rosenbaum PR, Rubin DB** (1985) Constructing a Control Group Using Multivariate  
453 Matched Sampling Methods That Incorporate the Propensity Score. *The American*  
454 *Statistician* **39**: 33
- 455 **Shortell SM, Gillies RR, Anderson DA, Mitchell JB, Morgan KL** (1993) Creating  
456 organized delivery systems: The barriers and facilitators. *Hospital and Health*  
457 *Services Administration* **38**: 447–466
- 458 **Sippy R** (2023) rsippy/THRIVE-fidelity: submission. doi: 10.5281/ZENODO.10402515
- 459 **Stuart EA** (2010) Matching Methods for Causal Inference: A Review and a Look Forward.  
460 *Stat Sci*. doi: 10.1214/09-STS313
- 461 **Stuart EA, Huskamp HA, Duckworth K, Simmons J, Song Z, Chernew ME, Barry CL**  
462 (2014) Using propensity scores in difference-in-differences models to estimate the

463 effects of a policy change. *Health Services and Outcomes Research Methodology*  
464 **14**: 166–182

465 **Venables WN, Ripley BD** (2002) *Modern Applied Statistics with S*, 4th Edition. Springer,  
466 New York

467 **Wickham H** (2007) Reshaping Data with the reshape Package. *Journal of Statistical*  
468 *Software* **21**: 1–20

469 **Wickham H, Averick M, Bryan J, Chang W, McGowan L, François R, Golemund G,**  
470 **Hayes A, Henry L, Hester J, et al** (2019) Welcome to the Tidyverse. *Journal of*  
471 *Open Source Software* **4**: 1686

472 **Wickham H, Bryan J** (2023) readxl: Read Excel Files.

473 **Wickham H, Miller E** (2017) haven: Import and Export “SPSS”, “Stata” and “SAS” Files.

474 **Wilke CO** (2020) cowplot: Streamlined plot theme and plot annotations for “ggplot2.”

475 **Xu Y** (2017) Generalized Synthetic Control Method: Causal Inference with Interactive Fixed  
476 Effects Models. *Political Analysis* **25**: 57–76

477 **Yoshida K, Bartel A** (2022) tableone: Create “table 1” to describe baseline characteristics  
478 with or without propensity score weights.

479

480

481

482

483

| <b>Table 1: Estimates of Association Between the National i-THRIVE Programme and THRIVE Fidelity</b> |                               |               |                |
|------------------------------------------------------------------------------------------------------|-------------------------------|---------------|----------------|
| <b>Outcome</b>                                                                                       | <b>Estimated Score Change</b> | <b>95% CI</b> | <b>p-value</b> |
| Overall Fidelity                                                                                     | 7.05                          | -4.47–18.57   | 0.212          |
| Macro-level Fidelity                                                                                 | 2.92                          | -1.09–6.92    | 0.141          |
| Meso-level Fidelity                                                                                  | 2.76                          | -1.98–7.51    | 0.234          |
| Micro-level Fidelity                                                                                 | 1.39                          | -3.94–6.72    | 0.588          |
| CI = confidence interval                                                                             |                               |               |                |

484

485

486

487

488

489

490

| <b>Table 2: Effect Modification by Working Relationship Quality on the Impact of the National i-THRIVE Programme</b> |                                     |                               |               |                |
|----------------------------------------------------------------------------------------------------------------------|-------------------------------------|-------------------------------|---------------|----------------|
| <b>Outcome</b>                                                                                                       | <b>Working Relationship Quality</b> | <b>Estimated Score Change</b> | <b>95% CI</b> | <b>p-value</b> |
| Overall Fidelity                                                                                                     | Highly effective                    | 16.41                         | 1.69–31.13    | 0.031          |
|                                                                                                                      | Ineffective                         | -2.76                         | -18.25–12.73  | 0.708          |
| Macro-level Fidelity                                                                                                 | Highly effective                    | 6.95                          | 2.15–11.75    | 0.007          |
|                                                                                                                      | Ineffective                         | -1.24                         | -6.29–3.80    | 0.605          |
| Meso-level Fidelity                                                                                                  | Highly effective                    | 5.52                          | -0.66–11.71   | 0.076          |
|                                                                                                                      | Ineffective                         | -0.75                         | -7.26–5.76    | 0.808          |
| Micro-level Fidelity                                                                                                 | Highly effective                    | 3.96                          | -3.24–11.15   | 0.257          |
|                                                                                                                      | Ineffective                         | -0.78                         | -8.35–6.79    | 0.828          |
| CI = confidence interval                                                                                             |                                     |                               |               |                |

491  
492  
493  
494  
495  
496  
497  
498  
499  
500  
501  
502  
503



## A. Implementation Sites

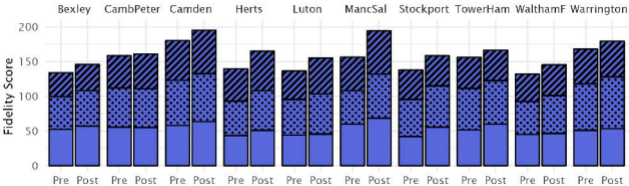

## B. Comparison Sites

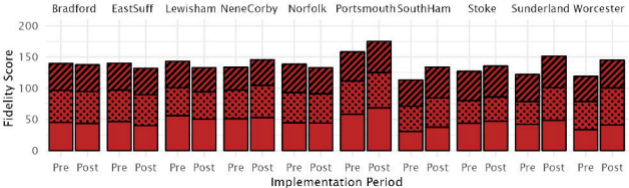

A. All Sites

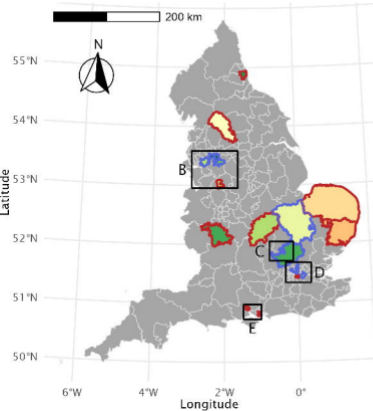

B. North West

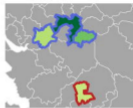

C. East of England

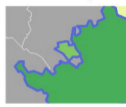

D. London

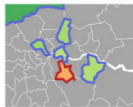

E. South East

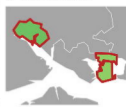

Site Type

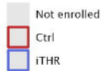

Change in Fidelity

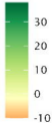

Source: https://www.medrxiv.org/content/10.1101/2024.05.07.24306984v1.full.pdf
